# Supplementary material for: The plasmonic effect of Cu on tuning CO2 reduction activity and selectivity
Source: Royal Society of Chemistry journal article supplement (doi:10.1039/d3cp05450k), 2023-12-20
Supplement: d3cp05450k1.pdf [file d3cp05450k1.pdf]

*Electronic Supporting Information*

**The Plasmonic Effect of Cu on Tuning CO<sub>2</sub>  
Reduction Activity and Selectivity**

Jing Xue,<sup>ab</sup> Zhenlin Chen,<sup>ab</sup> Kun Dang,<sup>ab</sup> Lei Wu,<sup>ab</sup> Hongwei Ji,<sup>ab</sup> Chuncheng Chen,<sup>ab</sup>

Yuchao Zhang<sup>\*ab</sup> and Jincai Zhao<sup>ab</sup>

<sup>a</sup> Key Laboratory of Photochemistry, Beijing National Laboratory for Molecular Sciences, Institute of Chemistry, Chinese Academy of Sciences, Beijing 100190, PR China.

<sup>b</sup> University of Chinese Academy of Sciences, Beijing 100049, P. R. China.

\* Corresponding author. Email: [yczhang@iccas.ac.cn](mailto:yczhang@iccas.ac.cn)

## Experimental details

### Chemicals

Copper sulfate pentahydrate ( $\text{CuSO}_4 \cdot 5\text{H}_2\text{O}$ ,  $\geq 99.0\%$ ), potassium hydrogen carbonate ( $\text{KHCO}_3$ ,  $\geq 99.7\%$ ) were purchased from Sigma Aldrich. Sodium hydroxide ( $\text{NaOH}$ ,  $> 99.0\%$ ), boric acid ( $\text{H}_3\text{BO}_3$ ,  $> 99.5\%$ ), phosphoric acid ( $\text{H}_3\text{PO}_4$ , 85%) were purchased from Inched. Anodic aluminum oxide (AAO, DP125-070-50000) template was purchased from Topmembranes Technology Co. Ltd. All the chemicals were used without purification. Deionized water was filtered by equipment (Millipore, Milli-RO Plus) in the laboratory. The Cu foil (99.9%, Alfa Aesar,  $2 \times 4 \text{ cm}^2$ ) was sonicated for 30 min in acetone and ethanol for cleaning, and then electropolished in 85%  $\text{H}_3\text{PO}_4$  at 2.0 V vs. graphite rod for 5 min. The Cu foil was subsequently rinsed with deionized water and blown dry with argon gas (Ar).

### Characterization

Scanning electron microscopy (SEM) images were obtained with a Hitachi S4800 scanning electron microscope (Hitachi Ltd.) operated at an acceleration voltage of 10 kV. Transmission electron microscopy (TEM) and High-resolution transmission electron microscopy (HRTEM) images were taken on a JEOL JEM-F200 microscope operating at an accelerating voltage of 200 kV. Ultraviolet-visible (UV-vis) diffuse reflectance spectrum was acquired on a Hitachi U-3900 spectrometer with  $\text{BaSO}_4$  as the reference. X-ray diffraction (XRD) patterns were obtained on a Bruker D8 Focus X-ray diffractometer with Cu  $K\alpha$  radiation ( $\lambda = 1.5405 \text{ \AA}$ ). X-ray photoelectron spectroscopy (XPS) measurements were performed on the Thermo Scientific ESCALab 250Xi using 200 W monochromatic Al  $K\alpha$  radiation, and the spectra were calibrated by C1s peak at 284.8 eV. The transient photovoltage (TPV, CEL-TPV2000, Beijing China Education AU-LIGHT Technology Co., Ltd.) measurements were performed with a 355 nm laser under an open-circuit condition. Raman spectra were collected using a confocal Raman microscope (Horiba LabRAM HR Evolution) with an excitation wavelength of 785 nm and a 50 $\times$  objective. Each Raman spectrum was acquired over a collection time of 60 s and is the average of two measurements.

## Formula derivation

The activation free energy of the reaction exhibits linear relationship with the reaction free energy, leading to the dependence of the reaction rate on the reaction free energy,<sup>1</sup> as shown in equ (S1):

$$RT\ln\left(\frac{rate}{A}\right) = -\Delta G \quad (S1)$$

where  $R$  is the gas constant ( $8.314 \text{ J mol}^{-1} \text{ K}^{-1}$ ),  $T$  is the temperature (K),  $A$  is the rate constant, and  $\Delta G$  is the standard Gibbs free energy ( $\text{J mol}^{-1}$ ). For an electrochemical half-reaction, there is an additional free energy contribution  $E$  (the applied potential), and the reaction rate is replaced by the current density ( $j$ ), therefore the Butler-Volmer relationship can be obtained, as shown in equ (S2):

$$RT\ln\left(\frac{j_{dark}}{A'}\right) = -\Delta G + \theta nFE \quad (S2)$$

where  $j_{dark}$  is the current density in the dark,  $A'$  is the constant with units of the current density,  $\theta$  is the phenomenological constant that incorporates the charge transfer coefficient,  $n$  is the number of electrons involved in the electrochemical reaction, and  $F$  is the Faraday constant. Under light irradiation, Cu NAs induced the generation of a photopotential, contributing an additional term of free energy, denoted as  $G_{photo}$ . As shown in equ (S3):

$$RT\ln\left(\frac{j_{photo}}{A'}\right) = -\Delta G + \theta nFE + G_{photo} \quad (S3)$$

where  $j_{photo}$  is the current density under the light. When equ (S2) and equ (S3) are combined, equ (S4) is obtained:

$$RT\ln\left(\frac{j_{photo}}{A'}\right) = RT\ln\left(\frac{j_{dark}}{A'}\right) + G_{photo} \quad (S4)$$

It is reported that the free energy contribution of electron-hole pairs generated by LSPR excitation scales linearly with the incident light intensity,  $I$ . Therefore, equ (S5) can be obtained:

$$RT\ln\left(\frac{j_{photo}}{A'}\right) = RT\ln\left(\frac{j_{dark}}{A'}\right) + \Phi I \quad (S5)$$

where  $\Phi$  is the photochemical conversion coefficient ( $\text{s cm}^2 \text{ mol}^{-1}$ ), which represents the free energy contributed to the  $\text{CO}_2\text{RR}$  by LSPR excitation of an incident intensity of  $1.0 \text{ W cm}^{-2}$ .

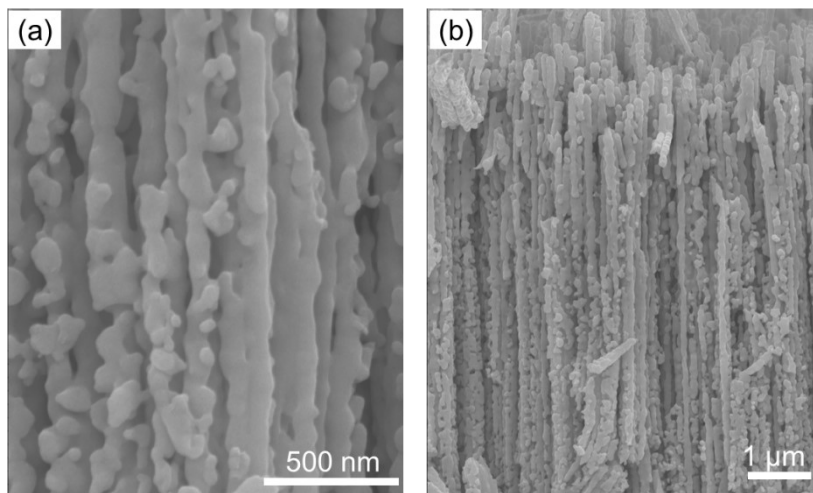

**Fig. S1** (a, b) SEM images of Cu NAs after the PEC reduction process.

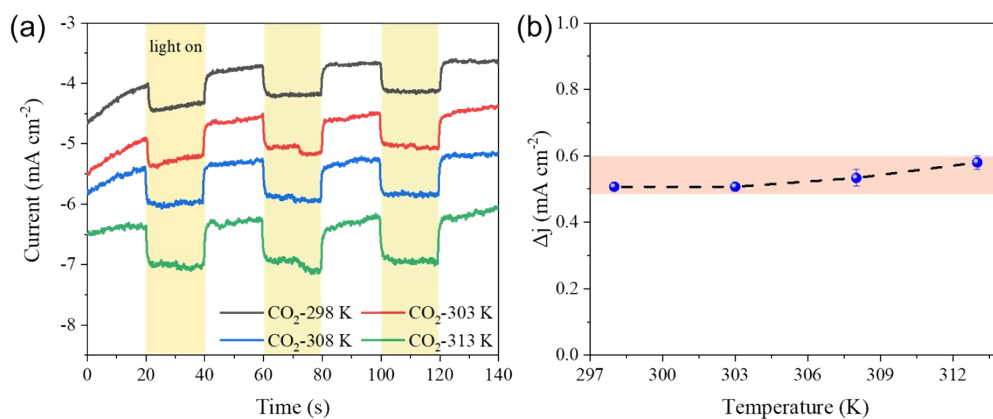

**Fig. S2** (a) Chronoamperometry (CA) curves of the Cu NAs photocathode with different temperatures at  $-0.6 V_{RHE}$  under chopped light irradiation with an interval of 20 s. (b) The  $\Delta j$  ( $j_{photo} - j_{dark}$ ) at  $-0.6 V_{RHE}$  as the function of the temperature.

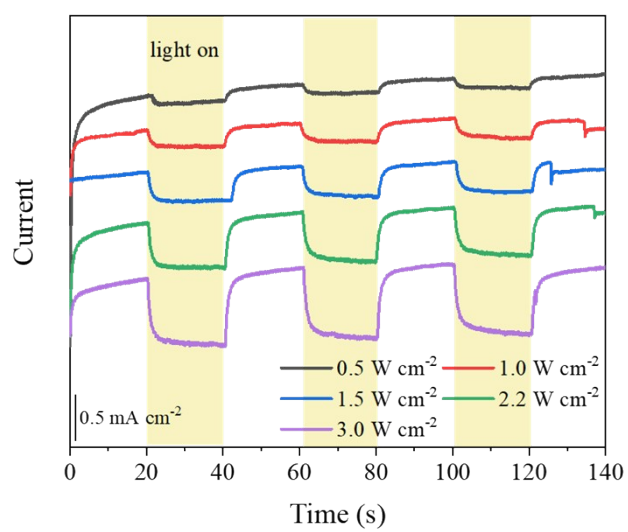

**Fig. S3** CA curves of the Cu NAs photocathode with different light intensities at  $-0.7$   $V_{\text{RHE}}$  under chopped light irradiation with an interval of 20 s.

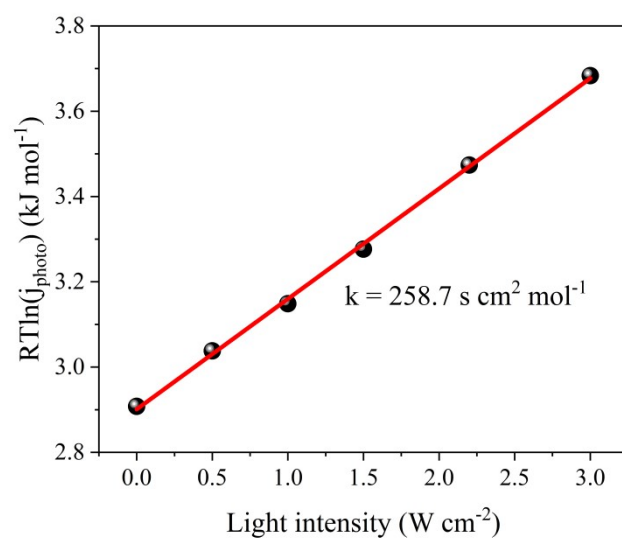

**Fig. S4** A plot of  $RT\ln(j_{\text{photo}})$  as a function of the incident light intensity for CO<sub>2</sub>RR on the Cu NAs photocathode under visible light irradiation.



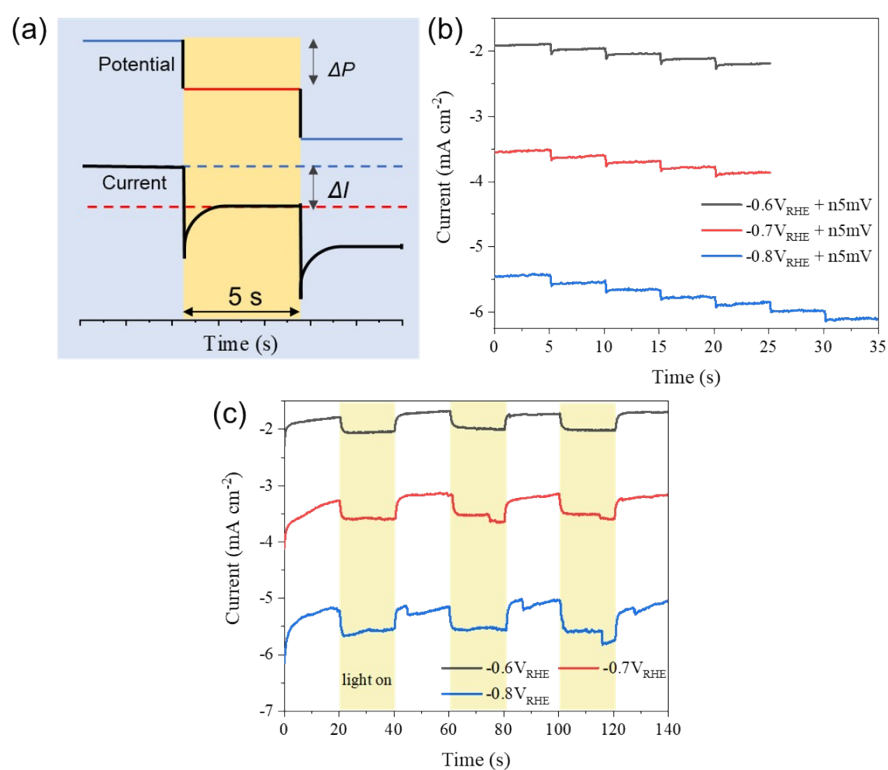

**Fig. S5** (a) Schematic of *i-t* curves in response to a potential step.  $\Delta I$  is the current change induced by the step potential ( $\Delta P$ ) after an interval of 5 s to stabilize. (b) The change of current as a function of the step potential (5 mV) at different applied potentials in the dark. (c) CA curves of the Cu NAs photocathode with different applied potentials under chopped light irradiation with an interval of 20 s.

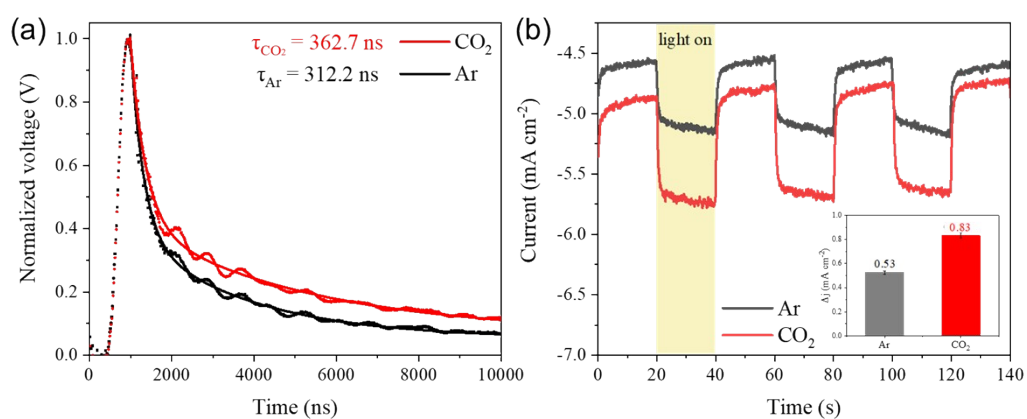

**Fig. S6** (a) TPV spectra of the Cu NAs photocathode measured in 0.1 M  $\text{KHCO}_3$  with Ar (black) or  $\text{CO}_2$  (red) atmosphere under open-circuit potential. (b) CA curves of the Cu NAs photocathode with Ar (black) and  $\text{CO}_2$  (red) atmospheres at  $-0.7 \text{ V}_{\text{RHE}}$  under chopped light irradiation with an interval of 20 s. The insert was  $\Delta j$  at Ar (black) and  $\text{CO}_2$  (red) atmospheres.

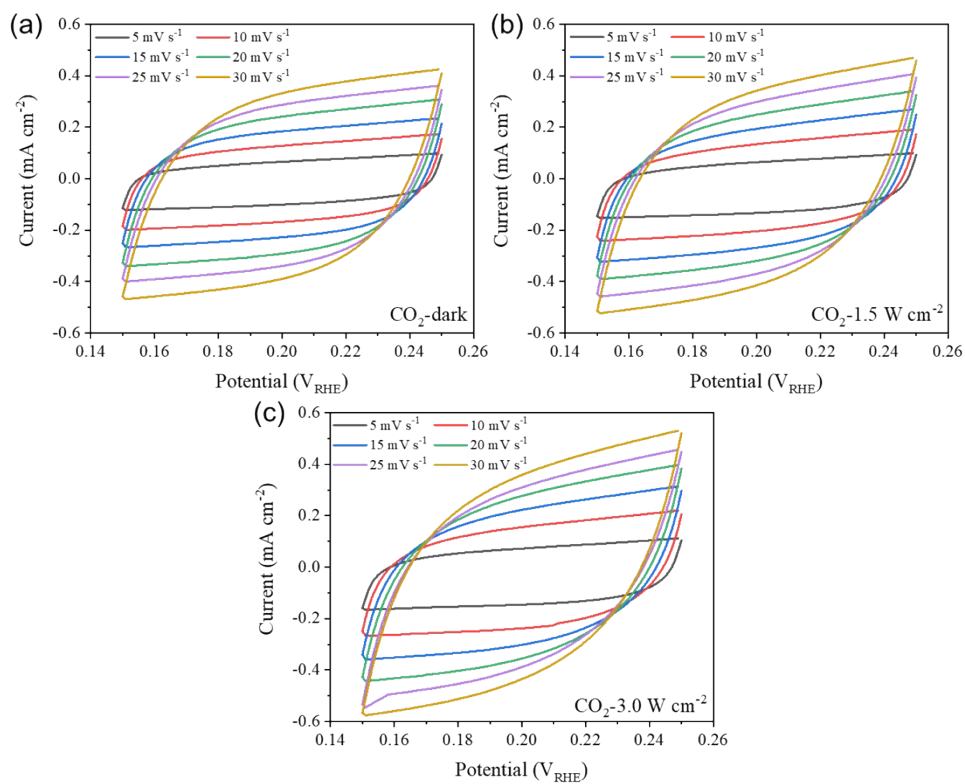

**Fig. S7** The CVs measured in aqueous 0.1 M  $\text{KHCO}_3$  electrolyte between 0.15  $V_{\text{RHE}}$  and 0.25  $V_{\text{RHE}}$  under different light intensities: (a) dark, (b) 1.5  $\text{W cm}^{-2}$ , and (c) 3.0  $\text{W cm}^{-2}$ .

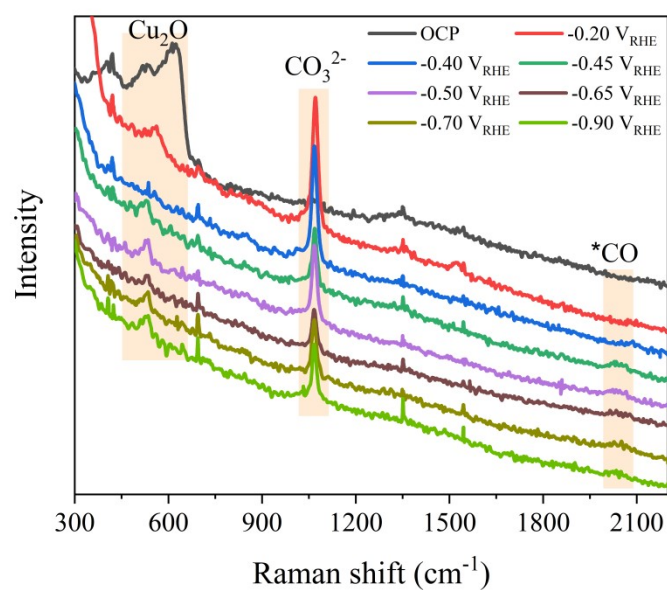

**Fig. S8** In situ Raman spectra recorded on Cu NAs during CO<sub>2</sub>RR under different applied potentials.

During the CO<sub>2</sub>RR process, when the applied cathodic potential increased, Cu<sub>2</sub>O was reduced to Cu<sup>0</sup>, and Cu<sub>2</sub>O (510, 612 cm<sup>-1</sup>) gradually disappeared.<sup>2</sup> At the same time, CO<sub>3</sub><sup>2-</sup> were detected, and the intermediate \*CO also appeared at -0.45 V<sub>RHE</sub>.

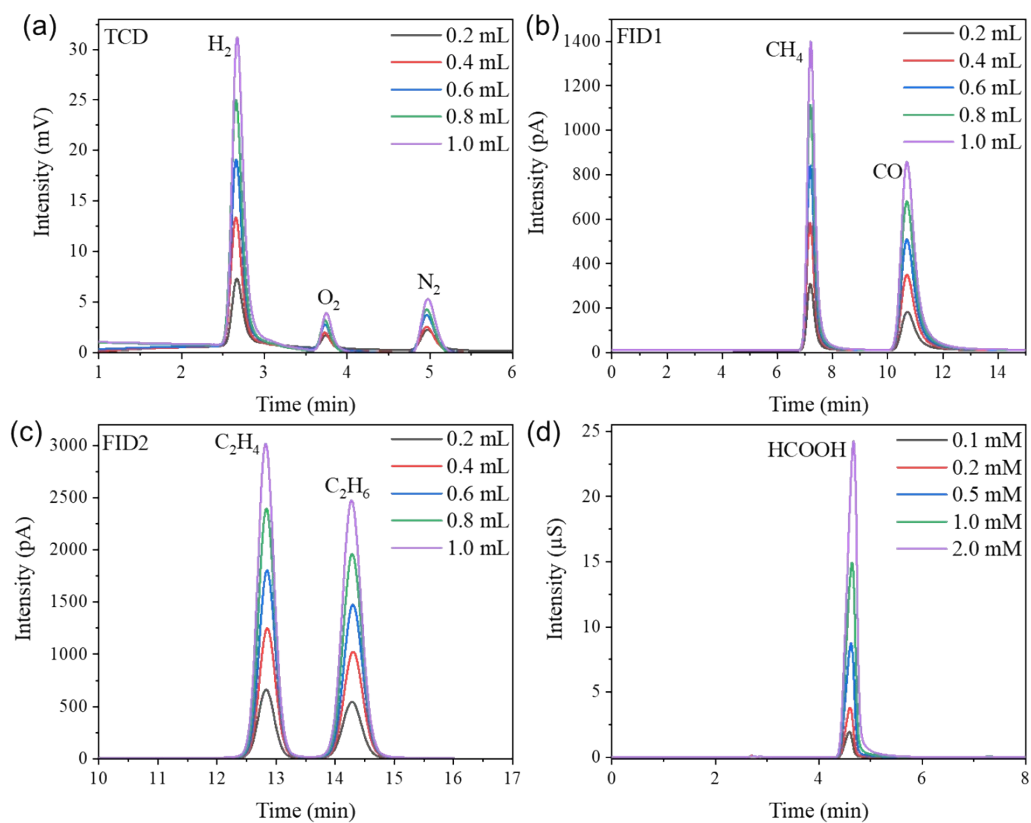

**Fig. S9** GC traces of different volumes of standard gases from (a) TCD and (b, c) FID channels. (d) IC signals of HCOOH with different concentrations. Peaks corresponding to the observed gaseous and liquid products are indicated. The gas concentrations are as follows:  $H_2$  (0.502%), CO (0.563%),  $CH_4$  (0.502%),  $C_2H_4$  (0.528%),  $C_2H_6$  (0.506%).

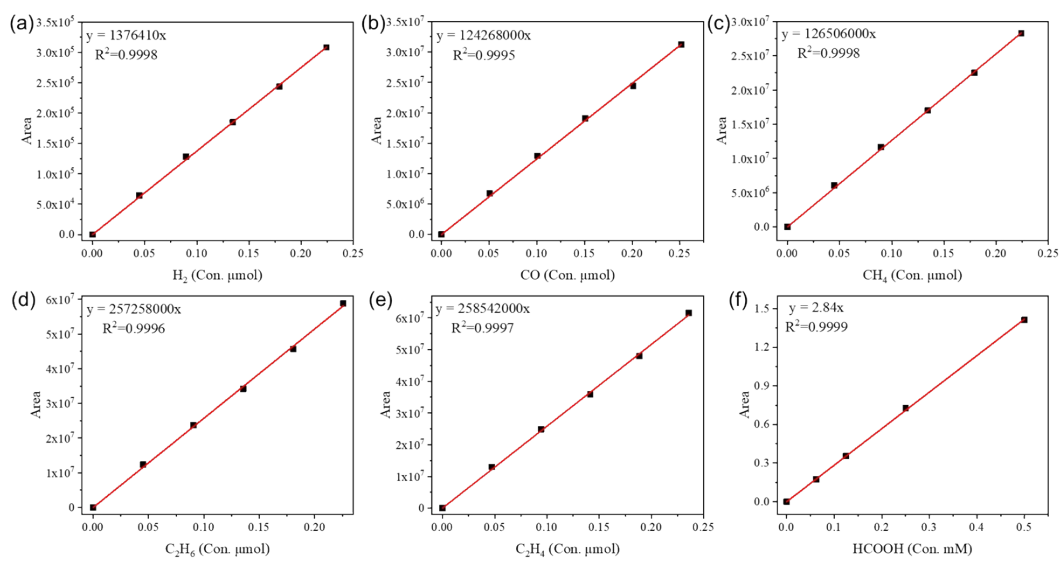

**Fig. S10** Standard curves for gas and liquid products.

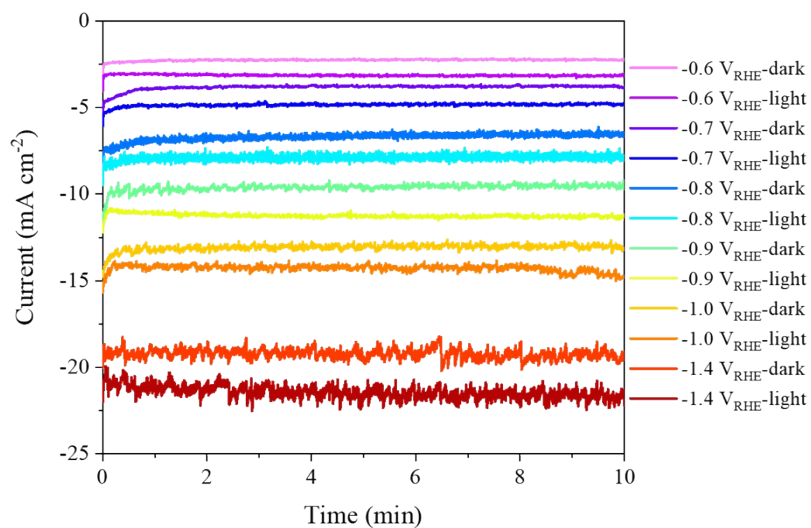

**Fig. S11** I-t curves of the Cu NAs photocathode under different potentials in the dark and under light irradiation.

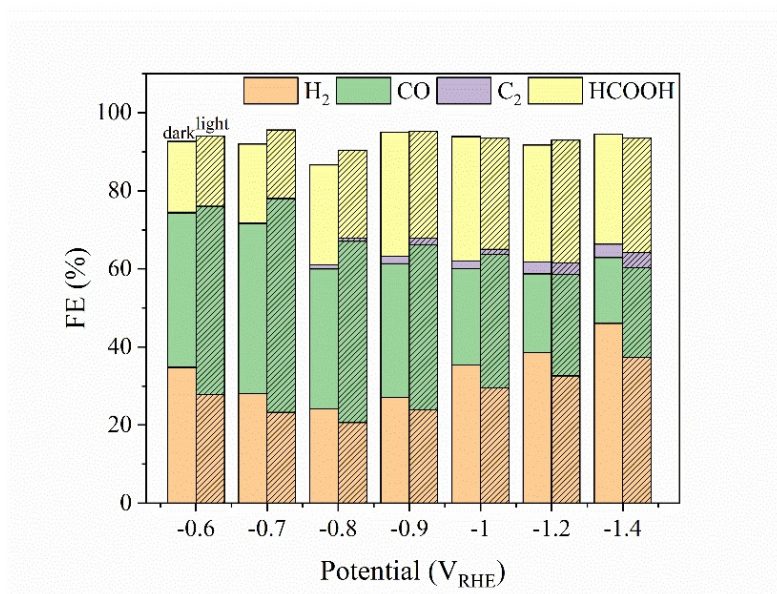

**Fig. S12** FE of the gas and liquid products under different applied potentials in the dark and under light irradiation.



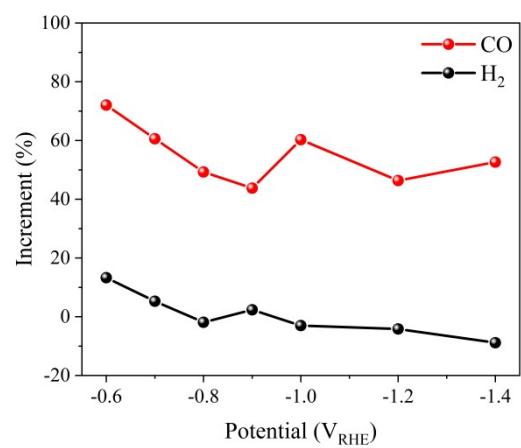

**Fig. S13** The increment of H<sub>2</sub> (black) and CO (red) production rates under different applied potentials.

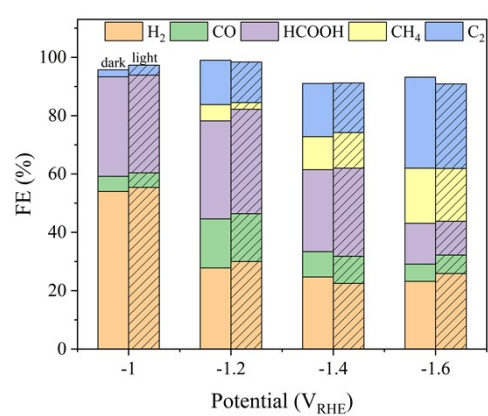

**Fig. S14** FE of the gas and liquid products on the Cu foil under different applied potentials in the dark and under light irradiation.

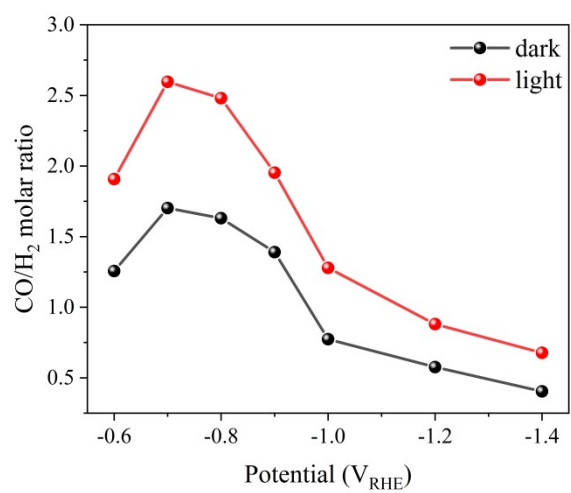

**Fig. S15** The molar ratio of CO/H<sub>2</sub> at different potentials in the dark and under light irradiation.

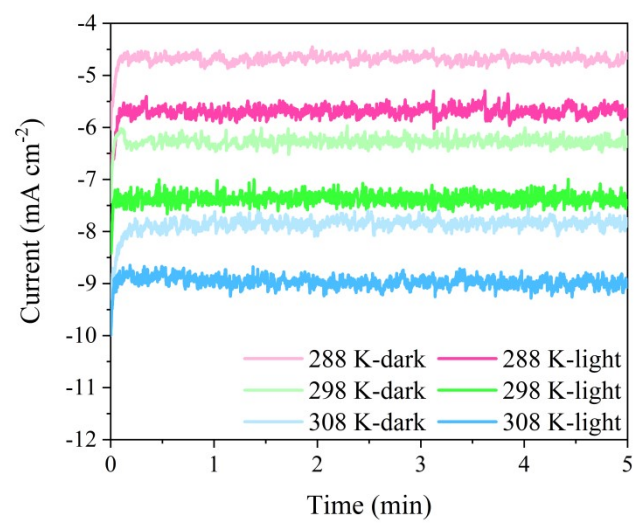

**Fig. S16** I-t curves of the Cu NAs photocathode under different temperatures in the dark and under visible light irradiation.

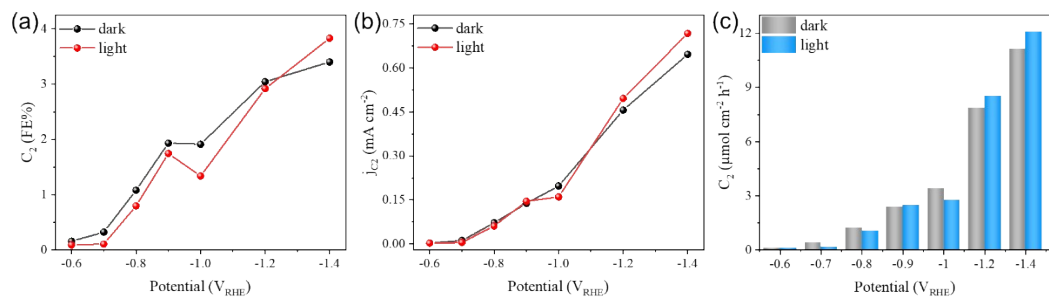

**Fig. S17** (a) FE<sub>C<sub>2</sub></sub>, (b) C<sub>2</sub> partial current density (c) and production rate in the dark and under light irradiation under different applied potentials.

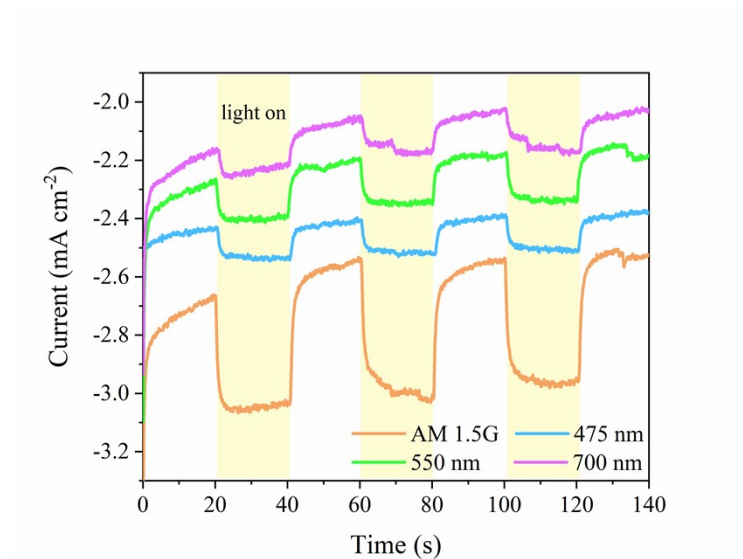

**Fig. S18** CA curves of the Cu NAs photocathode with different light sources at  $-0.7$   $V_{\text{RHE}}$  under chopped light irradiation with an interval of 20 s.

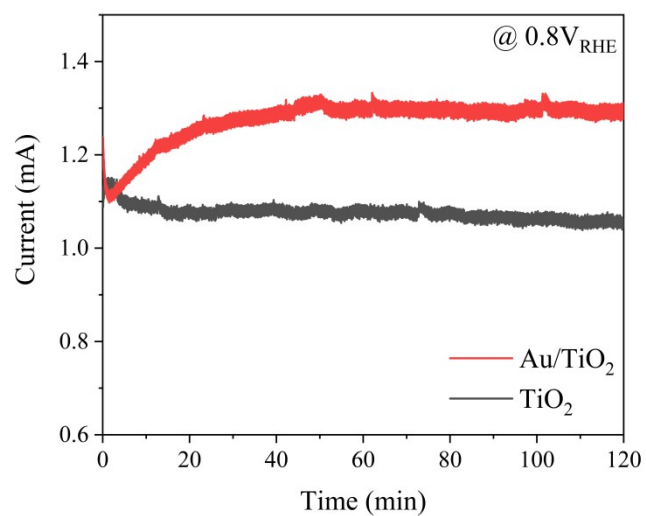

**Fig. S19** I-t curves were obtained during the activation of the Au/TiO<sub>2</sub> photoanode at 0.8 V<sub>RHE</sub> for 2 h under visible light irradiation in 0.5 M potassium borate buffer electrolyte.

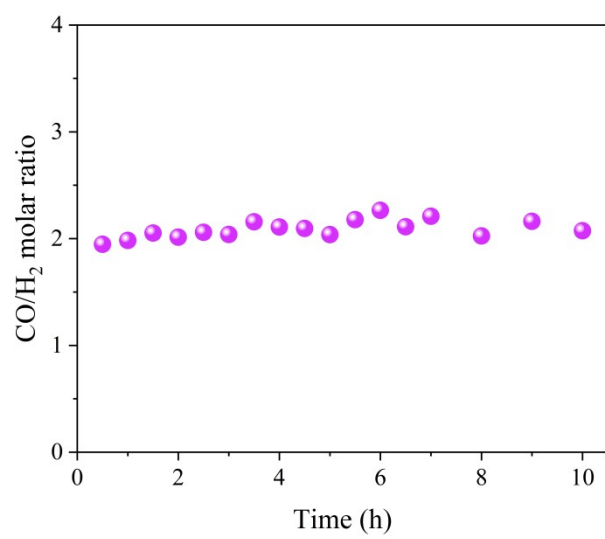

**Fig. S20** Stability test of CO/H<sub>2</sub> ratio in the solar-driven PEC device for CO<sub>2</sub>RR.



**Table S1** The fitted EIS data by using the Cu NAs photocathode under different potentials ranging from -0.5 to -0.8  $V_{\text{RHE}}$  in the dark and under light irradiation.

|                                                           | Potential ( $V_{\text{RHE}}$ ) | $R_s$ ( $\Omega$ ) | $R_{\text{ct}}$ ( $\Omega$ ) | $C_{\text{eff}}$ (mF) |
|-----------------------------------------------------------|--------------------------------|--------------------|------------------------------|-----------------------|
| Cu NAs<br>0.1 M $\text{KHCO}_3$<br>dark                   | -0.50 V                        | 13.0               | 123.0                        | 9.77                  |
|                                                           | -0.55 V                        | 13.3               | 78.3                         | 9.86                  |
|                                                           | -0.60 V                        | 13.5               | 46.5                         | 8.81                  |
|                                                           | -0.65 V                        | 13.5               | 32.3                         | 9.17                  |
|                                                           | -0.70 V                        | 13.6               | 24.7                         | 11.30                 |
|                                                           | -0.75 V                        | 13.4               | 19.8                         | 12.60                 |
|                                                           | -0.80 V                        | 12.9               | 17.4                         | 19.20                 |
| Cu NAs<br>0.1 M $\text{KHCO}_3$<br>3.0 $\text{W cm}^{-2}$ | -0.50 V                        | 12.9               | 78.9                         | 10.40                 |
|                                                           | -0.55 V                        | 13.2               | 48.3                         | 10.00                 |
|                                                           | -0.60 V                        | 13.5               | 30.8                         | 8.99                  |
|                                                           | -0.65 V                        | 12.8               | 21.5                         | 7.18                  |
|                                                           | -0.70 V                        | 12.8               | 17.1                         | 8.39                  |
|                                                           | -0.75 V                        | 13.3               | 15.2                         | 11.50                 |
|                                                           | -0.80 V                        | 13.1               | 13.1                         | 17.60                 |

**Table S2** The FE of CO<sub>2</sub>RR products by using the Cu NAs photocathode under different potentials ranging from -0.6 to -1.4 V<sub>RHE</sub> in the dark and under light irradiation.

|                                                             | Potential (V <sub>RHE</sub> ) | Q (C) | H <sub>2</sub> (FE%) | CO (FE%) | HCOOH (FE%) | C <sub>2</sub> (FE%) | FE%   |
|-------------------------------------------------------------|-------------------------------|-------|----------------------|----------|-------------|----------------------|-------|
| Cu NAs<br>0.1 M KHCO <sub>3</sub><br>dark                   | -0.6V – 10 min                | 0.65  | 34.76                | 39.60    | 18.10       | 0.16                 | 92.62 |
|                                                             | -0.7V – 10 min                | 1.10  | 28.10                | 43.35    | 20.15       | 0.32                 | 91.92 |
|                                                             | -0.8V – 10min                 | 2.00  | 24.19                | 35.75    | 25.57       | 1.08                 | 86.59 |
|                                                             | -0.9V – 10min                 | 2.15  | 27.13                | 34.19    | 31.72       | 1.93                 | 94.97 |
|                                                             | -1.0V – 10min                 | 3.10  | 35.31                | 24.78    | 31.90       | 1.91                 | 93.90 |
|                                                             | -1.2V – 10min                 | 4.50  | 38.55                | 20.15    | 29.93       | 3.04                 | 91.67 |
|                                                             | -1.4V – 10min                 | 5.70  | 46.02                | 16.86    | 28.12       | 3.40                 | 94.40 |
| Cu NAs<br>0.1 M KHCO <sub>3</sub><br>3.0 W cm <sup>-2</sup> | -0.6V – 10 min                | 0.92  | 27.82                | 48.13    | 17.98       | 0.10                 | 94.03 |
|                                                             | -0.7V – 10 min                | 1.40  | 23.23                | 54.70    | 17.54       | 0.10                 | 95.57 |
|                                                             | -0.8V – 10min                 | 2.30  | 20.63                | 46.40    | 22.54       | 0.80                 | 90.37 |
|                                                             | -0.9V – 10min                 | 2.50  | 23.88                | 42.27    | 27.35       | 1.75                 | 95.25 |
|                                                             | -1.0V – 10min                 | 3.60  | 29.49                | 34.20    | 28.42       | 1.34                 | 93.45 |
|                                                             | -1.2V – 10min                 | 5.10  | 32.59                | 26.02    | 31.42       | 2.92                 | 92.95 |
|                                                             | -1.4V – 10min                 | 6.40  | 37.35                | 22.92    | 29.30       | 3.83                 | 93.40 |

### Supplemental References

1. J. Wang, J. Heo, C. Chen, A. J. Wilson and P. K. Jain, Ammonia Oxidation Enhanced by Photopotential Generated by Plasmonic Excitation of a Bimetallic Electrocatalyst, *Angew. Chem. Int. Ed.*, 2020, **59**, 18430-18434.
2. Y. Zhao, X.-G. Zhang, N. Bodappa, W.-M. Yang, Q. Liang, P. M. Radjenovica, Y.-H. Wang, Y.-J. Zhang, J.-C. Dong, Z.-Q. Tian and J.-F. Li, Elucidating Electrochemical CO<sub>2</sub> Reduction Reaction Processes on Cu(hkl) Single-Crystal Surfaces by in situ Raman Spectroscopy, *Energ Environ. Sci.*, 2022, **15**, 3968-3977.
